# Supplementary material
Source: Springer Nature journal article supplement (https://www.springermedizin.de/resource/supplementary/12936_2010_1237_MOESM4_ESM.pdf/9549304)

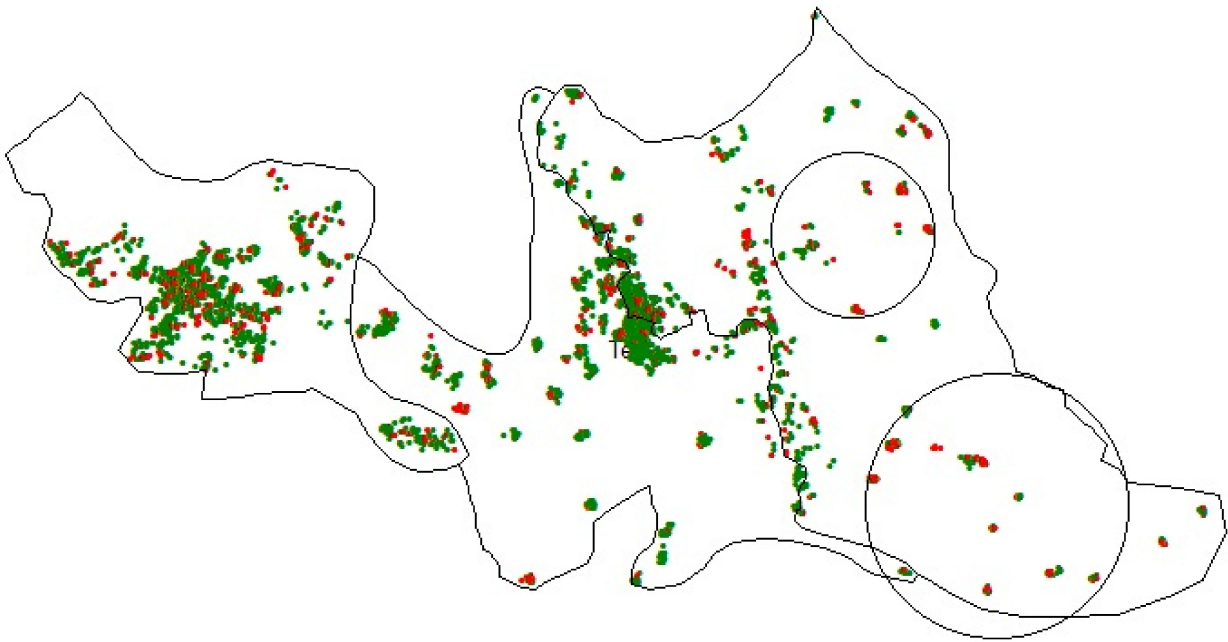

## Legend

 Boundary

Number of bed net

 < 2

  $\geq 2$

 Cluster

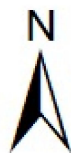

 Kilometers  
0 2.5 5 10

Supplement: MOESM4 [file 9549304]
